Dstl ©Crown Copyright, 2021

1 **Evaluation of the SARS-CoV-2 inactivation efficacy associated with buffers from three kits**  
2 **used on high-throughput RNA extraction platforms**

3 **Ruth E. Thom<sup>a</sup>, Lin S. Eastaugh<sup>a</sup>, Lyn M. O'Brien<sup>a</sup>, David O. Ulaeto<sup>a</sup>, James S. Findlay<sup>a</sup>,**  
4 **Sophie J. Smither<sup>a</sup>, Amanda L. Phelps<sup>a</sup>, Helen L. Stapleton<sup>a</sup>, Karleigh A. Hamblin<sup>a</sup>, Simon A.**  
5 **Weller<sup>a#</sup>**

6 <sup>a</sup>**CBR Division, Dstl Porton Down, Salisbury, United Kingdom**

7 <sup>#</sup>Address correspondence to Simon A. Weller, [sweller@dstl.gov.uk](mailto:sweller@dstl.gov.uk)

8 © Crown copyright (2021), Dstl. This material is licensed under the terms of the Open

9 Government Licence except where otherwise stated. To view this licence, visit

10 <http://www.nationalarchives.gov.uk/doc/open-government-licence/version/3> or write to

11 the Information Policy Team, The National Archives, Kew, London TW9 4DU, or email:

12 [psi@nationalarchives.gov.uk](mailto:psi@nationalarchives.gov.uk)

13

14 **ABSTRACT**

15 Rapid and demonstrable inactivation of SARS-CoV-2 is crucial to ensure operator safety  
16 during high-throughput testing of clinical samples. The inactivation efficacy of SARS-CoV-2  
17 was evaluated using commercially available lysis buffers from three viral RNA extraction kits  
18 used on two high-throughput (96-well) RNA extraction platforms (Qiagen QiaCube HT and  
19 the ThermoFisher Kingfisher Flex) in combination with thermal treatment. Buffer volumes  
20 and sample ratios were chosen for their optimised suitability for RNA extraction rather than  
21 inactivation efficacy and tested against a representative sample type; SARS-CoV-2 spiked  
22 into viral transport medium (VTM). A lysis buffer from the MagMax Pathogen RNA/DNA kit

Dstl ©Crown Copyright, 2021

23 (ThermoFisher), used on the Kingfisher Flex, which included guanidinium isothiocyanate  
24 (GITC), a detergent, and isopropanol demonstrated a minimum inactivation efficacy of  $1 \times$   
25  $10^5$  TCID<sub>50</sub>/ml. An alternative lysis buffer from the MagMax Viral/Pathogen Nucleic Acid kit  
26 (Thermofisher) also used on the Kingfisher Flex and the lysis buffer from QIAamp 96 Virus  
27 QIAcube HT Kit (Qiagen) used on the QiaCube HT (both of which contained GITC and a  
28 detergent) reduced titres by  $1 \times 10^4$  TCID<sub>50</sub>/ml but did not completely inactivate the virus.  
29 Heat treatment alone (15 minutes, 68 °C) did not completely inactivate the virus,  
30 demonstrating a reduction of  $1 \times 10^3$  TCID<sub>50</sub>/ml. When inactivation methods included both  
31 heat treatment and addition of lysis buffer, all methods were shown to completely  
32 inactivate SARS-CoV-2 inactivation against the viral titres tested. Results are discussed in  
33 the context of the operation of a high-throughput diagnostic laboratory.

## 34 **INTRODUCTION**

35 Severe acute respiratory syndrome coronavirus-2 (SARS-CoV-2) belongs to the  
36 Coronaviridae family and is the causative agent of the respiratory illness, coronavirus  
37 disease (COVID-19) (1). The enveloped positive-sense single-stranded RNA virus was first  
38 discovered in early 2020 after a cluster of viral pneumonia cases of unknown cause were  
39 reported in the Hubei Province of China (2). The virus is highly contagious in humans and in  
40 March 2020 The World Health Organisation (WHO) declared a global pandemic (3).  
41 Diagnostic testing is critical in the fight against the COVID-19 pandemic (4), not just for  
42 patients displaying symptoms but also for asymptomatic carriers and pre-symptomatic  
43 patients (5). SARS-CoV-2 has been classified in the UK as a Hazard Group (HG) 3 pathogen  
44 by the Advisory Committee for Dangerous Pathogens (ACDP), meaning that this virus must  
45 be handled under Containment Level (CL) 3 conditions. However, guidance from WHO (6)

Dstl ©Crown Copyright, 2021

46 and Public Health England, UK (7) has permitted non-propagative diagnostic testing to be  
47 carried out at CL 2 with non-inactivated samples being handled within a Class I microbiology  
48 safety cabinet.

49 Real-time reverse transcriptase polymerase chain reaction (RT-PCR) is the gold standard test  
50 to for the detection of SARS-CoV-2 from nasopharyngeal swab samples (8). Inactivation of  
51 viral pathogens prior to PCR is typically carried out at the same time as extraction of viral  
52 nucleic acids from samples, with chemical or physical methods employed. Typically buffers  
53 provided in nucleic acid extraction kits contain chaotropic salts, solvents, and detergents to  
54 lyse the virus. Guanidinium salts, such as guanidinium thiocyanate (GITC), are chaotropic  
55 agents found in many lysis buffers which in some cases have been demonstrated to  
56 inactivate viral pathogens, including alphaviruses, flaviviruses, filoviruses and a bunyavirus  
57 (9, 10). Other reports though suggest that a combination of a GITC containing extraction  
58 buffer (such as Qiagen AVL) and a solvent (such as ethanol), is required for the inactivation  
59 of viruses such as Ebola virus (11) and Middle East Respiratory Syndrome coronavirus  
60 (MERS-CoV) (12). Detergents such as Tween, SDS and Triton X100 have also been shown to  
61 disrupt viral envelopes and reduce viral titres (13-15), with a combination of the GITC based  
62 reagent (Buffer AVL) and Triton X100 having been reported to inactivate Ebola virus (16).  
63 Physical processes such as heat can also be incorporated in the nucleic acid extraction  
64 workflow and can have an inactivation effect. Some reports suggest that the application of  
65 heat alone can inactivate SARS-CoV, MERS-CoV and SARS-CoV-2 following a heat regimen of  
66 65 °C for at least 15 minutes (17-19).

67 Due to commercial sensitivity, manufacturers of extraction kits are not required to publish  
68 the full ingredient list of proprietary buffers (with potential viral inactivating components

Dstl ©Crown Copyright, 2021

69 only inferred if they are listed on associated Material Safety Data Sheets(MSDS)) and post-  
70 treatment viability test methods vary in stringency across studies. Due to the disparate and  
71 varying literature sources describing the efficacy of inactivation methods for the extraction  
72 of RNA, a standardised protocol for the inactivation of SARS-CoV-2 was developed and  
73 experimental validation of the different approaches was undertaken.

74 Since the pandemic was declared, UK's Defence Science Technology Laboratory (Dstl) and  
75 British military clinicians have set up the Defence COVID lab (DCL), which has been awarded  
76 an extension to scope (under ISO17025) for the provision of a SARS-COV-2 PCR test by the  
77 United Kingdom Accreditation Service (UKAS). The DCL analyses samples from UK military  
78 units and operates two automated high-throughput RNA extraction platforms (Qiagen  
79 QiaCube HT and the ThermoFisher Kingfisher Flex). In this study we report the inactivation  
80 efficacy of SARS-CoV-2 by buffers from three commercially available kits used on these two  
81 platforms. Buffer volumes and ratios were chosen for their suitability for RNA extraction  
82 (following manufacturer's instructions) rather than their potential inactivation efficacy,  
83 however in doing so we have further investigated the inactivation efficacy of combinations  
84 of GITC containing buffers, solvents, and/or detergents with and without an additional heat  
85 inactivation step. We provide evidence to support protocols for the inactivation of SARS-  
86 CoV-2 and the safe use of clinical samples in down-stream RT-PCR in high-throughput  
87 diagnostic laboratories.

## 88 **METHODS**

### 89 **Virus strains, cell culture and reagents**

90 All cell culture was carried out using confluent monolayers of Vero C1008 cells (European  
91 Collection of Cell Cultures [ECACC], United Kingdom; catalogue no. 85020206) maintained

Dstl ©Crown Copyright, 2021

92 in Dulbecco's minimal essential medium (DMEM; Sigma, United Kingdom) supplemented  
93 with 10% fetal calf serum, 1% L-glutamine and 1% penicillin-streptomycin (Sigma, United  
94 Kingdom) and incubated at 37 °C in a 5% CO<sub>2</sub> environment. Prior to virus being added to cell  
95 monolayers, 10% DMEM was replaced with Leibovitz's L-15 (to buffer for the lack of CO<sub>2</sub> at  
96 CL3), supplemented as described for DMEM, with the exception of 2% fetal calf serum and  
97 incubated at 37 °C. All virus manipulations were carried out under BSL/CL 3 conditions using  
98 the SARS-CoV-2 England 2 strain (GISAID reference EPI\_ISL\_407073), provided by Public  
99 Health England. Virus stock was propagated in Vero C1008 cell, harvested at day 3 and  
100 clarified by centrifugation at 350 x g for 15 minutes (Sigma 3-16K centrifuge). Viral stocks  
101 were concentrated by centrifugation at 11, 000 x g for 3 hours at 4 °C to achieve 1x10<sup>8</sup>  
102 Tissue Culture Infectious Dose (TCID)<sub>50</sub>/ml. All virus stocks were stored at -80 °C. Buffers  
103 and reagents from three different RNA extraction kits were assessed to determine  
104 inactivation of SARS-CoV-2 (Table 1). The composition of these initial reagents and their  
105 suitability for extraction of SARS-CoV-2 RNA from clinical samples was determined based on  
106 manufacture protocols and after discussions with each manufacturer.

#### 107 **Viral inactivation**

108 The inactivation efficacy of the lysis buffers in all three protocols was evaluated with and  
109 without the inclusion of a heat step. Table 1 summarises the components and volumes used  
110 for each lysis buffer preparation. MS2 bacteriophage (10<sup>6</sup> Plaque Forming Unit (PFU)/ml)  
111 was added to each lysis buffer preparation as an internal control in the DCL, Dstl. Test  
112 samples for each experiment were set up in triplicate and each experiment was performed  
113 on at least three separate occasions.

Dstl ©Crown Copyright, 2021

114 Viral transfer medium (VTM; EO Labs, United Kingdom) was inoculated with SARS-CoV-2 to  
115 achieve a starting concentration of  $5 \times 10^6$  TCID<sub>50</sub>/ml for all experiments. To the lysis buffer  
116 preparations, 200 µl of virus in VTM was added, the samples were briefly vortexed and  
117 incubated for 10 minutes at room temperature. For heat treated samples, the tubes were  
118 incubated for 25 minutes in a heat block (Eppendorf ThermoMixer C heat) set at 75 °C.  
119 Laboratory tests showed that this was the temperature setting required for this individual  
120 heat block to heat and maintain the samples at 68 °C for 15 minutes. Heat steps were  
121 carried out after the addition of virus to either lysis buffer reagents or to an equivalent  
122 volume of tissue culture medium (TCM), to assess the effect of viability following heat in the  
123 presence or absence of reagents. Further controls included sham-inactivated virus, where  
124 appropriate volume of TCM replaced the lysis buffer reagents and negative controls  
125 consisting of VTM-only added to lysis buffer reagents to assess the effect of the reagents on  
126 cell monolayers.

127 After inactivation (with or without heat treatment) all samples and controls were pelleted  
128 by centrifugation at 6, 000 x *g* for 5 minutes in a microcentrifuge (Hermle Microlitre  
129 Centrifuge Z 160 M). The supernatant was discarded and the pellet resuspended in 1 ml  
130 TCM and washed a further 4 times for the Qiagen reagents and 2 times for the Kingfisher  
131 reagents in order to remove all traces of the inactivation chemicals from the sample and to  
132 avoid toxicity during cell culture. After the final wash the pellets were re-suspended in 1ml  
133 of TCM.

134 **Post inactivation viral viability assays**

Dstl ©Crown Copyright, 2021

135 To quantify and determine the viability of the virus following inactivation, the samples were  
136 prepared for TCID<sub>50</sub> end-point dilution assay (20) and the remaining sample underwent  
137 three rounds of serial passage in tissue culture flasks.

138 In brief, TCID<sub>50</sub> assay was performed using Vero C1008 cells prepared in 96-well microtitre  
139 plates to achieve confluent monolayers on the day of assay. To all wells of column 1 of the  
140 plate 100 µl of test sample was added. From column 1, 20 µl of sample was transferred  
141 sequentially across the plate to achieve a 10-fold serial dilution to column 9. Cells in  
142 columns 11 and 12 were left in TCM as controls. Plates were incubated in a humidified  
143 atmosphere for 3 - 4 days at 37 °C, after which they were scored for cytopathic effects (CPE)  
144 by microscopic observation. The TCID<sub>50</sub> value was calculated by the method of Reed and  
145 Muench (21).

146 For secondary confirmation of viral inactivation, all of the remaining sample (approx. 180  
147 µl) was added to confluent monolayer of Vero C1008 cells in a 12.5 cm<sup>2</sup> tissue culture flask.  
148 Flasks were incubated in a humidified atmosphere for 3 - 4 days after which presence or  
149 absence of cytopathic effect was recorded. A total of three passages were performed and  
150 CPE recorded after each round. To control for cross-contamination a set of un-infected  
151 flasks were also prepared and supernatant passaged in parallel to the experimental samples.  
152 A 10-fold serially dilution of SARS-CoV-2 was also inoculated into a set of flasks starting from  
153  $1.7 \times 10^7$  TCID<sub>50</sub>/ml and diluted to 1.1 TCID<sub>50</sub>/ml to show the Limit of Detection (LOD) of the  
154 flask passage assay and demonstrate a suitable environment for the passage and  
155 propagation of the virus.

156 **Statistical analysis**

157 All data were graphically represented and statistically analysed using GraphPad Prism 8.  
158 Kruskal-Wallis analysis of variance (ANOVA) was performed on data sets with Dunn's  
159 multiple comparison post hoc.

## 160 **RESULTS**

161 The inactivation of SARS-CoV-2 was assessed using three different RNA lysis buffers with and  
162 without the inclusion of a heat step. The viability of virus was determined quantitatively  
163 using the TCID<sub>50</sub> assay and qualitatively by serially passaging samples in flask.

### 164 **Determination of starting concentration of SARS-CoV-2**

165 These studies used the highest working concentration of SARS-CoV-2 that was available and  
166 this ranged from  $5.9 \times 10^5$  to  $3.5 \times 10^6$  TCID<sub>50</sub>/ml (Figure 1). Following the inactivation  
167 procedure residual toxic lysis buffer components were removed by way of multiple wash  
168 steps. Residual chemical components would otherwise be toxic to the cell based assays. To  
169 determine if the multiple wash steps by centrifugation resulted in a loss of virus, virus was  
170 inoculated into TCM without the addition of lysis reagents (as described in materials and  
171 methods) and assayed as described. This highlighted there was approximately a 1-Log<sub>10</sub> drop  
172 in titre, providing a mean viral titre of  $2.4 \times 10^5$  TCID<sub>50</sub>/ml (Figure 1A, B and C).

### 173 **Chemical inactivation of SARS-CoV-2**

174 When virus was added to the Qiagen lysis buffer there was a statistically significant 5-Log<sub>10</sub>  
175 drop in virus titre from  $4.4 \times 10^5$  TCID<sub>50</sub>/ml to below the lower limit of quantification (LLOQ)  
176 ( $p=0.002$ ) Complete inactivation was not achieved however, as virus was detected below  
177 the LLoQ but this was not quantifiable. However by extrapolation it was estimated that the  
178 titre was 6.2 TCID<sub>50</sub>/ml (Figure 1A).



Dstl ©Crown Copyright, 2021

179 Similar results were observed when virus was inactivated using the MagMax protocol 2;  
180 complete inactivation was not achieved as virus was detected below the LLoQ, and was not  
181 quantifiable. The starting titre of virus for these experiments, following washing steps was  
182  $7.7 \times 10^4$  TCID<sub>50</sub>/ml, demonstrating a 4-Log<sub>10</sub> drop in viral titre following inactivation  
183 ( $p < 0.0001$ ) (Figure 1C).

184 Virus inactivation following the MagMax protocol 1 resulted in no detectable virus by TCID<sub>50</sub>  
185 assay. The starting concentration of virus, following washing steps was calculated to be  
186  $2 \times 10^5$  TCID<sub>50</sub>/ml, thus demonstrating a 5-Log<sub>10</sub> drop in viral titre with this particular protocol  
187 ( $p < 0.0001$ ) (Figure 1B).

#### 188 **Heat inactivation of SARS-CoV-2**

189 Heat alone or in combination with lysis buffer was also investigated as a means to inactivate  
190 SARS-CoV-2. For each experiment, virus in TCM was heated at 68 °C for 15 minutes and  
191 centrifuged to maintain consistency with samples in lysis buffer. Although not statistically  
192 significant, at least a 3-Log<sub>10</sub> drop in viral titre was observed following heat treatment alone,  
193 with an average titre of remaining viable virus across all experiments of  $3.2 \times 10^2$  TCID<sub>50</sub>/ml  
194 (Figure 1).

195 When the virus was added to either of the three lysis buffers and subsequently heated, no  
196 viable virus was detected following TCID<sub>50</sub> assay and an average drop in viral titre of 5-Log<sub>10</sub>  
197 across all experiments ( $p < 0.0001$ ) (Figure 1A, B and C).

#### 198 **Confirmation of inactivation by viral propagation**

199 To confirm findings by TCID<sub>50</sub> assay viral samples were propagated in cell culture flasks over  
200 a total of three passages to identify potential viral break-through. Table 2 shows the results  
201 of the presence of CPE after the first passage. The limit of detection for viral propagation

Dstl ©Crown Copyright, 2021

202 was determined following propagation of serially diluted virus stocks (Table 2 row 1 to 5)

203 and on average the limit of detection was 1.3 TCID<sub>50</sub>/ml.

204 When virus was added to TCM, CPE was present in all flasks as expected (Table 2 row 6,

205 positive control). No cell toxicity was observed from negative control samples were TCM-

206 only was added to lysis buffer and washed as described previously (Table 2 row 10, negative

207 control).

208 When SARS-CoV-2 was inactivated following the Qiagen protocol, 3 out of the 9 flasks were

209 scored as positive for CPE. Of the flasks where no CPE was observed, no break-through of

210 virus was seen as a result of serial passage (Table 2 row 7). This data aligns with the TCID<sub>50</sub>

211 assays, where Qiagen lysis buffer alone did not completely inactivate the virus. Following

212 both MagMax protocols, 0 out of the 9 flasks were scored positively for CPE (Table 2 row 7).

213 For the MagMax protocol 1 this confirms the TCID<sub>50</sub> results, where no viable virus was also

214 observed. For the MagMax protocol 2, virus was detected but not quantifiable in the TCID<sub>50</sub>

215 assay (below the LLoQ), however subsequent serial passage did not provide evidence of

216 viability, as all flasks were negative for CPE.

217 When SARS-CoV-2 was added to TCM and heated for 15 minutes at 68 °C, CPE was observed

218 in all but one flask (Table 2 row 8) confirming the TCID<sub>50</sub> results that the heating protocol

219 described here does not completely inactivate the virus.

220 For all inactivation protocols, when SARS-CoV-2 samples were treated in a two-step manner,

221 (lysis buffer and heat), no viable virus was detected in either the quantitative or qualitative

222 assays (Figure 1 and Table 2 row 9). This data provides strong evidence that the lysis buffers

223 described here in combination with the heat protocol can completely inactivate up to 5-

224 Log<sub>10</sub> TCID<sub>50</sub>/ml SARS-CoV-2.

## 225 **DISCUSSION**

226 Real-time PCR is the gold standard clinical diagnostic method for the detection of SARS-CoV-  
227 2 in patients displaying symptoms of COVID-19. There has been a rapid development in RNA  
228 extraction and RT-PCR diagnostic methods in order to help prevent further spread of  
229 infection through communities. It is crucial that testing is accurate and efficient, both of  
230 which must not compromise safety of those processing the samples (22). Laboratory  
231 acquired infections due to incomplete inactivation or incorrect handling of samples have  
232 been reported for SARS-CoV (23, 24) as well as many other infectious agents (25). To date,  
233 there are only a handful of publications reporting the use of nucleic acid isolation reagents,  
234 detergents and heat to inactivate SARS-CoV-2 (18, 26-28).

235 In our study we investigated the SARS-CoV-2 inactivation efficacy of viral lysis buffers from  
236 three commercially available kits developed to allow RNA extraction on high-throughput (96  
237 well) automated platforms. For each kit the initial lysis buffer mix, developed from  
238 manufacturer's instructions, included a guanidine based lysis buffer with additional viral  
239 inactivating components such as a solvent and / or a detergent. Each mix was added to 200  
240  $\mu$ l of a representative clinical sample (SARS-CoV-2 in viral transport medium). Furthermore  
241 we tested all three protocols with and without the addition of a thermal inactivation step at  
242 68 °C for 15 minutes.

243 We started with the highest possible titre of SARS-CoV-2 that we had available and first  
244 determined the titre of virus following wash steps, which were required to remove any  
245 chemical compounds that would be cytotoxic to the cell based assays. We chose to remove  
246 the reagents from the samples by centrifugation and in doing so, demonstrated a loss of  
247 approximately 1-Log<sub>10</sub> of virus. Other researchers have used centrifugation columns or

Dstl ©Crown Copyright, 2021

248 filters but again report a similar loss in viral titre (14) or residual toxicity leading to reduced  
249 sensitivity of the read-out of the assays (28). The wash steps employed here eliminated all  
250 residual toxicity, allowing the sensitivity of our assay read-outs to be unaffected.

251 In our study, the chemicals used to assess the inactivation of SARS-CoV-2 were  
252 combinations of GITC, detergent and solvent. The Qiagen protocol (using reagents from the  
253 QIAamp 96 Virus QIAcube HT Kit) and the MagMax Protocol 2 (using reagents from the  
254 MagMax viral/pathogen nucleic acid isolation kit) both included GITC and a detergent, (SDS  
255 or zwittergent, respectively) (Table 1). Both of these inactivation buffers significantly  
256 reduced viral titres of SARS-CoV-2 by 4-Log<sub>10</sub> however complete inactivation of viable virus  
257 was not achieved as detectable, but not quantifiable, virus was detected in the TCID<sub>50</sub> assay  
258 (below LLoQ). Subsequent serial passage of viral samples following inactivation using the  
259 Qiagen protocol demonstrated virus break-through confirming the results observed in the  
260 TCID<sub>50</sub> assay. It was also anticipated that serial passage of virus inactivated following  
261 MagMax protocol 2 would have amplified and enabled virus break-through too, but this was  
262 not observed. The stated GITC composition of Qiagen Buffer ACL (30-50%) is lower than  
263 that of the MagMax Lysis buffer (55-80%) and thus the higher GITC composition in the  
264 MagMax buffer may have exerted a greater efficacy of viral inactivation, although we could  
265 not demonstrate complete inactivation. As described previously GITC based chemicals  
266 alone have been reported to inactivate some viruses (9, 10) but as observed here and by  
267 others this is not always the case (11, 12, 16). Studies by Pastorino *et al* (27), have assessed  
268 the inactivation of SARS-CoV-2 using the detergent containing Buffer ATL and in contrast to  
269 our findings reported greater than a 6-Log<sub>10</sub> drop in virus titre. The SDS composition of  
270 Buffer ATL used by Pastorino *et al* (2020) was 1 – 10%, however, the SDS composition of ATL  
271 buffer in our study, was 1 - <3% SDS (Table 1). Pastorino *et al* (2020) also used a 1:1 ratio of

Dstl ©Crown Copyright, 2021

272 ATL buffer to sample, where as in our protocol we used a reagent to sample ratio of 0.5 : 1.  
273 Thus the work of Pastorino *et al* (2020) infers a higher concentration of this detergent and  
274 larger reagent to sample ratio would be critical for the inactivation process. This also  
275 underlines the potential for different concentrations of components in products that are  
276 ostensibly the same. Patterson *et al* (2020) and Welch *et al* (14, 28) screened a number of  
277 detergents for their inactivation efficacy against SARS-CoV-2. Patterson *et al* (2020)  
278 reported that 0.5% SDS inactivated SARS-CoV-2, but used a low starting titre of  $10^2$  PFU (14),  
279 whereas Welch *et al* (2020) also reported a drop in virus titre of 6.5  $\text{Log}_{10}$  TCID<sub>50</sub>/ml but  
280 viable virus was still observed (28).

281 In our study, the only protocol that inactivated virus without an additional heat step was  
282 MagMax Protocol 1 (using reagents from the MagMax Pathogen RNA/DNA kit), where no  
283 CPE was observed from either TCID<sub>50</sub> assay or following three rounds of serial passage in  
284 tissue culture flasks. The MagMax Protocol 1 included the MagMax lysis binding buffer  
285 which contained GITC and the detergent Zwittergent. With the addition of 2-propanol  
286 within the lysis buffer mix there were, therefore, three components likely to exert a  
287 disruptive effect on the SARS-CoV-2 viral envelope. The reagent to sample ratio of 3.8 : 1  
288 was also higher, with more than double the volume of lysis buffer mix added to each  
289 sample, compared to the other two methods assessed (Table 1).

290 Our results suggest that both a high reagent to sample ratio and the incorporation of a  
291 solvent improved the inactivation efficacy of a chemical only method. The SARS-CoV-2  
292 inactivation efficacy of the GITC-based Buffer AVL (Qiagen) in combination with ethanol has  
293 been assessed in two studies. Complete SARS-CoV-2 inactivation was reported by Welch *et*  
294 *al* (2020) (28) in contrast to incomplete inactivation by Pastorino *et al* (2020) (27). This

295 contradiction in findings could be due to the ratios of reagent, solvent and sample used.  
296 Both studies used 4 volumes of AVL to 1 volume of sample; however volumes of ethanol  
297 used in combination with Buffer AVL may explain the varying results. Welch *et al* (2020)  
298 used 4 volumes of ethanol in combination with AVL and sample, whereas Pastorino *et al*  
299 (2020) only added 1 volume of ethanol to the AVL-sample combination. In our studies using  
300 the MagMax Protocol 1 the ratio of lysis buffer and isopropanol were considerably less with  
301 1.8 volumes of lysis buffer and 1.5 volumes of solvent, but the addition of the detergent  
302 Zwittergent (within the MagMax Lysis Buffer) may have enhanced the inactivation. The  
303 addition of the enzyme Proteinase K in both the Qiagen method and MagMax protocol 2 did  
304 not appear to have enhanced inactivation efficacy.

305 We also investigated the efficacy of thermal inactivation, by heating the sample to, and then  
306 maintaining at, 68 °C for 15 minutes. Heat inactivation alone reduced the viral titre by 3-  
307 Log<sub>10</sub>, although this was not statistically significant compared to the controls, and was not as  
308 effective as the use of lysis buffers alone. Burton *et al* 2021 (26) report similar findings with  
309 incomplete inactivation of SARS-CoV-2 at 56 and 60 °C for up to 60 minutes. In contrast,  
310 some studies have reported the successful use of heat for complete inactivation of SARS-  
311 CoV and SARS-CoV-2 (17, 18). Kim *et al* 2020 (18) demonstrated the complete inactivation  
312 of SARS-CoV-2 in clinical samples following incubation at 65 °C for 30 minutes, although this  
313 work was based on quantitative TCID<sub>50</sub> assays alone. Furthermore, Darnell *et al* (17)  
314 reported complete inactivation of SARS-CoV after heating at 65 °C for 60 minutes, the  
315 longer time was required to ensure any viral aggregates were fully exposed and inactivated  
316 by the heat treatment.

Dstl ©Crown Copyright, 2021

317 The use of heat to inactivate virus has been reported to reduce viral RNA stability (29, 30)  
318 and depending on the target gene used for RT-PCR, incubation at 65 °C for 30 minutes can  
319 significantly reduce the target copy numbers leading to false negative results of clinical  
320 samples (18, 30). The DCL has an accredited SARS-CoV-2 diagnostic workflow (31) using the  
321 Qiagen and Kingfisher (using MagMax protocol 1) extraction platforms each with an  
322 additional heat inactivation step. Multiple External Quality Assessment panels and  
323 reference standards have been tested during DCL set-up and operation. The E-Gene PCR  
324 assay (32) is used in this laboratory and in our hands the heat inactivation regime we  
325 employ does not appear to adversely affect PCR results.

326 In determining the practical relevance of our work the viral loads in COVID19 samples likely  
327 to be encountered in a high-throughput diagnostic laboratory should be considered.  
328 Currently there is little information on the infectious viral load present on a clinical  
329 nasal/throat swab. Most of the data report Ct values following RT-PCR (33) but one study  
330 has estimated that there is a median titre of  $10^3$  TCID<sub>50</sub>/ml collected from 90  
331 nasopharyngeal or endotracheal clinical samples (34). During DCL validation studies a  
332 precisely defined reference standard dilution series of entire SARS-CoV-2 virions (SARS-CoV-  
333 2 Analytical Q Panel; Qnostics Ltd, UK) was tested (data not shown). Within this series the  
334 highest concentration of material was 6 Log<sub>10</sub> digital copies (dC)/ml and following RNA  
335 extraction using the Qiagen method described in this paper mean E-gene (32) quantification  
336 cycle (C<sub>q</sub>) values of 22.65 were returned from this concentration. During DCL operation we  
337 have commonly tested positive samples with E-gene PCR C<sub>q</sub> values in the low teens, with  
338 occasional samples returning C<sub>q</sub> values <13. Although care must be taken in comparing and  
339 extrapolating PCR (C<sub>q</sub>), TCID<sub>50</sub>/ml and dC/ml values this is consistent with a study reporting

Dstl ©Crown Copyright, 2021

340 similarly low  $C_q$  values from COVID patients early in the infection cycle (35) and indicates  
341 that some swab samples can contain very high viral loads.

342 We have demonstrated the SARS-CoV-2 inactivation efficacy of the reagents found in lysis  
343 buffers of three commercially available kits used on high-throughput extraction platforms.  
344 Only when combined with a heat step did all methods show a complete inactivation of  
345 SARS-CoV-2 by both TCID<sub>50</sub> assay and by sequential passage in tissue culture. Therefore in  
346 the DCL samples are sequentially mixed with lysis buffer and then followed with heat  
347 treatment. This approach also extends the contact time of lysis buffer to sample which  
348 should further enhance the inactivation efficacy of the buffers and mitigates the fact that in  
349 this inactivation study we were unable to test samples with a starting concentration greater  
350 than  $5.9 \times 10^5$  TCID<sub>50</sub>/ml (in view of the likely higher concentrations seen in samples  
351 received). In our studies, we also did not include samples that contain potential interfering  
352 substances or true samples, however Pastorino *et al* (2020) (27) did include interfering  
353 substances and a range of clinical samples and no obvious impact of these sample types  
354 were reported on the efficacy of the viral inactivation process.

355 Due to the contrasting literature for inactivation of SARS-CoV-2 (and that of viruses  
356 generally) a case-by-case assessment of different inactivation protocols is essential to  
357 prevent laboratory acquired infections. To ensure the highest safety standards (and also  
358 taking into account the high viral loads of samples tested), in the operational DCL we  
359 employ methods that utilise the inactivation efficacies of the chemical components of lysis  
360 buffers found in commercial kits with that of the heat. As a result, the high-throughput RNA  
361 extraction platforms are performed on the open bench rather than within a Class 1  
362 microbiological safety cabinet. All laboratories must make the appropriate assessments



363 regarding methods applicable to their unique set of circumstances. The results presented in  
364 this study may help laboratories undertake such assessments, especially if they do not have  
365 access to high containment facilities to complete in-house inactivation studies.

## 366 **ACKNOWLEDGMENTS**

367 The set up and validation of the Defence COVID Laboratory (of which this study was a part)  
368 was funded by the UK Department of Health and Social Care (DHSC). The authors thank  
369 representatives of Qiagen and ThermoFisher for help in defining suitable RNA extraction  
370 protocols.

## 371 **REFERENCES**

- 372 1. Gorbalenya AE, Baker SC, Baric RS, de Groot RJ, Drosten C, Gulyaeva AA, Haagmans  
373 BL, Lauber C, Leontovich AM, Neuman BW, Penzar D, Perlman S, Poon LLM,  
374 Samborskiy DV, Sidorov IA, Sola I, Ziebuhr J, Grp CS. 2020. The species Severe acute  
375 respiratory syndrome-related coronavirus: classifying 2019-nCoV and naming it  
376 SARS-CoV-2. *Nature Microbiology* 5:536-544.
- 377 2. Wu F, Zhao S, Yu B, Chen YM, Wang W, Song ZG, Hu Y, Tao ZW, Tian JH, Pei YY, Yuan  
378 ML, Zhang YL, Dai FH, Liu Y, Wang QM, Zheng JJ, Xu L, Holmes EC, Zhang YZ. 2020. A  
379 new coronavirus associated with human respiratory disease in China. *Nature*  
380 579:265-269.
- 381 3. Chen J. 2020. Pathogenicity and transmissibility of 2019-nCoV-A quick overview and  
382 comparison with other emerging viruses. *Microbes Infect* 22:69-71.
- 383 4. Patel R, Babady E, Theel ES, Storch GA, Pinsky BA, St George K, Smith TC, Bertuzzi S.  
384 2020. Report from the American Society for Microbiology COVID-19 International

- 385 Summit, 23 March 2020: Value of Diagnostic Testing for SARS-CoV-2/COVID-19. mBio  
386 11.
- 387 5. Shental N, Levy S, Wuvshet V, Skorniakov S, Shalem B, Ottolenghi A, Greenshpan Y,  
388 Steinberg R, Edri A, Gillis R, Goldhirsh M, Moscovici K, Sachren S, Friedman LM,  
389 Neshet L, Shemer-Avni Y, Porgador A, Hertz T. 2020. Efficient high-throughput SARS-  
390 CoV-2 testing to detect asymptomatic carriers. Sci Adv 6.
- 391 6. World Health Organization. 2020. Laboratory biosafety guidance related to  
392 coronavirus disease (COVID-19). WHO/WPE/GIH/20203  
393 [https://www.who.int/publications/i/item/laboratory-biosafety-guidance-related-to-](https://www.who.int/publications/i/item/laboratory-biosafety-guidance-related-to-coronavirus-disease-(covid-19))  
394 [coronavirus-disease-\(covid-19\)](https://www.who.int/publications/i/item/laboratory-biosafety-guidance-related-to-coronavirus-disease-(covid-19)).
- 395 7. Public Health England. 2020. COVID-19: guidance for sampling and for diagnostic  
396 laboratories. [https://www.gov.uk/government/publications/wuhan-novel-](https://www.gov.uk/government/publications/wuhan-novel-coronavirus-guidance-for-clinical-diagnostic-laboratories)  
397 [coronavirus-guidance-for-clinical-diagnostic-laboratories](https://www.gov.uk/government/publications/wuhan-novel-coronavirus-guidance-for-clinical-diagnostic-laboratories).
- 398 8. Tahamtan A, Ardebili A. 2020. Real-time RT-PCR in COVID-19 detection: issues  
399 affecting the results. Expert Rev Mol Diagn 20:453-454.
- 400 9. Blow JA, Dohm DJ, Negley DL, Mores CN. 2004. Virus inactivation by nucleic acid  
401 extraction reagents. J Virol Methods 119:195-8.
- 402 10. Ngo KA, Jones SA, Church TM, Fuschino ME, George KS, Lamson DM, Maffei J,  
403 Kramer LD, Ciota AT. 2017. Unreliable Inactivation of Viruses by Commonly Used  
404 Lysis Buffers. Applied Biosafety 22:56-59.
- 405 11. Smither SJ, Weller SA, Phelps A, Eastaugh L, Ngugi S, O'Brien LM, Steward J, Lonsdale  
406 SG, Lever MS. 2015. Buffer AVL Alone Does Not Inactivate Ebola Virus in a  
407 Representative Clinical Sample Type. J Clin Microbiol 53:3148-54.

- 408 12. Kumar M, Mazur S, Ork BL, Postnikova E, Hensley LE, Jahrling PB, Johnson R,  
409 Holbrook MR. 2015. Inactivation and safety testing of Middle East Respiratory  
410 Syndrome Coronavirus. *J Virol Methods* 223:13-8.
- 411 13. Mayo DR, Beckwith WH. 2002. Inactivation of West Nile virus during serologic testing  
412 and transport. *Journal of Clinical Microbiology* 40:3044-3046.
- 413 14. Patterson EI, Prince T, Anderson ER, Casas-Sanchez A, Smith SL, Cansado-Utrilla C,  
414 Solomon T, Griffiths MJ, Acosta-Serrano A, Turtle L, Hughes GL. 2020. Methods of  
415 Inactivation of SARS-CoV-2 for Downstream Biological Assays. *J Infect Dis* 222:1462-  
416 1467.
- 417 15. van Kampen JJA, Tintu A, Russcher H, Fraaij PLA, Reusken CBEM, Rijken M, van  
418 Hellemond JJ, van Genderen PJJ, Koelewijn R, de Jong MD, Haddock E, Fischer RJ,  
419 Munster VJ, Koopmans MPG. 2017. Ebola Virus Inactivation by Detergents Is  
420 Annulled in Serum. *Journal of Infectious Diseases* 216:859-866.
- 421 16. Burton JE, Easterbrook L, Pitman J, Anderson D, Roddy S, Bailey D, Vipond R, Bruce  
422 CB, Roberts AD. 2017. The effect of a non-denaturing detergent and a guanidinium-  
423 based inactivation agent on the viability of Ebola virus in mock clinical serum  
424 samples. *J Virol Methods* 250:34-40.
- 425 17. Darnell ME, Subbarao K, Feinstone SM, Taylor DR. 2004. Inactivation of the  
426 coronavirus that induces severe acute respiratory syndrome, SARS-CoV. *J Virol*  
427 *Methods* 121:85-91.
- 428 18. Kim YI, Casel MAB, Kim SM, Kim SG, Park SJ, Kim EH, Jeong HW, Poo H, Choi YK. 2020.  
429 Development of severe acute respiratory syndrome coronavirus 2 (SARS-CoV-2)  
430 thermal inactivation method with preservation of diagnostic sensitivity. *J Microbiol*  
431 58:886-891.

- 432 19. Leclercq I, Batejat C, Burguiere AM, Manuguerra JC. 2014. Heat inactivation of the  
433 Middle East respiratory syndrome coronavirus. *Influenza and Other Respiratory*  
434 *Viruses* 8:585-586.
- 435 20. Piercy TJ, Smither SJ, Steward JA, Eastaugh L, Lever MS. 2010. The survival of  
436 filoviruses in liquids, on solid substrates and in a dynamic aerosol. *Journal of Applied*  
437 *Microbiology* 109:1531-1539.
- 438 21. Reed LJ, Muench H. 1938. A Simple Method of Estimating Fifty per cent Endpoints.  
439 *American Journal of Epidemiology* 27:493-497.
- 440 22. Dhamad AE, Abdal Rhida MA. 2020. COVID-19: molecular and serological detection  
441 methods. *PeerJ* 8:e10180.
- 442 23. Lim PL, Kurup A, Gopalakrishna G, Chan KP, Wong CW, Ng LC, Se-Thoe SY, Oon L, Bai  
443 X, Stanton LW, Ruan Y, Miller LD, Vega VB, James L, Ooi PL, Kai CS, Olsen SJ, Ang B,  
444 Leo YS. 2004. Laboratory-acquired severe acute respiratory syndrome. *N Engl J Med*  
445 350:1740-5.
- 446 24. Taylor JW, D.; Bernard, K. A.; Masters, P. S.; Trimarchi, C. V. 2005. SARS Coronaviruses  
447 and Highly Pathogenic Influenza Viruses: Safety and Occupational Health for  
448 Laboratory Workers. *Emerg Infect Dis* 11:e3.
- 449 25. Singh K. 2009. Laboratory-acquired infections. *Clin Infect Dis* 49:142-7.
- 450 26. Burton J, Love H, Richards K, Burton C, Summers S, Pitman J, Easterbrook L, Davies K,  
451 Spencer P, Killip M, Cane P, Bruce C, Roberts ADG. 2021. The effect of heat-  
452 treatment on SARS-CoV-2 viability and detection. *J Virol Methods* 290:114087.
- 453 27. Pastorino B, Touret F, Gilles M, Luciani L, de Lamballerie X, Charrel RN. 2020.  
454 Evaluation of Chemical Protocols for Inactivating SARS-CoV-2 Infectious Samples.  
455 *Viruses-Basel* 12.

- 456 28. Welch SR, Davies KA, Buczkowski H, Hettiarachchi N, Green N, Arnold U, Jones M,  
457 Hannah MJ, Evans R, Burton C, Burton JE, Guiver M, Cane PA, Woodford N, Bruce CB,  
458 Roberts ADG, Killip MJ. 2020. Analysis of Inactivation of SARS-CoV-2 by Specimen  
459 Transport Media, Nucleic Acid Extraction Reagents, Detergents, and Fixatives. *J Clin*  
460 *Microbiol* 58.
- 461 29. Pan Y, Long L, Zhang D, Yuan T, Cui S, Yang P, Wang Q, Ren S. 2020. Potential False-  
462 Negative Nucleic Acid Testing Results for Severe Acute Respiratory Syndrome  
463 Coronavirus 2 from Thermal Inactivation of Samples with Low Viral Loads. *Clin Chem*  
464 66:794-801.
- 465 30. Zou J, Zhi S, Chen M, Su X, Kang L, Li C, Su X, Zhang S, Ge S, Li W. 2020. Heat  
466 inactivation decreases the qualitative real-time RT-PCR detection rates of clinical  
467 samples with high cycle threshold values in COVID-19. *Diagn Microbiol Infect Dis*  
468 98:115109.
- 469 31. UKAS. 2020. Schedule of Accreditation issued by United Kingdom Accreditation  
470 Service. [https://www.ukas.com/wp-](https://www.ukas.com/wp-content/uploads/schedule_uploads/00002/1886Testing-Singlepdf)  
471 [content/uploads/schedule\\_uploads/00002/1886Testing-Singlepdf](https://www.ukas.com/wp-content/uploads/schedule_uploads/00002/1886Testing-Singlepdf).
- 472 32. Corman VM, Landt O, Kaiser M, Molenkamp R, Meijer A, Chu DKW, Bleicker T,  
473 Brunink S, Schneider J, Schmidt ML, Mulders DGJC, Haagmans BL, van der Veer B,  
474 van den Brink S, Wijsman L, Goderski G, Romette JL, Ellis J, Zambon M, Peiris M,  
475 Goossens H, Reusken C, Koopmans MPG, Drosten C. 2020. Detection of 2019 novel  
476 coronavirus (2019-nCoV) by real-time RT-PCR. *Eurosurveillance* 25:23-30.
- 477 33. Pan Y, Zhang D, Yang P, Poon LLM, Wang Q. 2020. Viral load of SARS-CoV-2 in clinical  
478 samples. *Lancet Infect Dis* 20:411-412.

Dstl ©Crown Copyright, 2021

- 479 34. Bullard J, Dust K, Funk D, Strong JE, Alexander D, Garnett L, Boodman C, Bello A,  
 480 Hedley A, Schiffman Z, Doan K, Bastien N, Li Y, Van Caesele PG, Poliquin G. 2020.  
 481 Predicting infectious SARS-CoV-2 from diagnostic samples. Clin Infect Dis  
 482 doi:10.1093/cid/ciaa638.
- 483 35. Jang S, Rhee JY, Wi YM, Jung BK. 2021. Viral kinetics of SARS-CoV-2 over the  
 484 preclinical, clinical, and postclinical period. Int J Infect Dis 102:561-565.

485 **TABLE 1. Protocols tested for assessing inactivation using lysis buffers.**

| <b>Manufacturer,<br/>RNA extraction kit,<br/>Platform.</b>                                                                  | <b>Reagents<br/>(volume / sample)</b> | <b>Active virucidal<br/>components*</b>                         | <b>Reagent :<br/>Sample ratio</b> |
|-----------------------------------------------------------------------------------------------------------------------------|---------------------------------------|-----------------------------------------------------------------|-----------------------------------|
| Qiagen,<br>QIAamp 96 Virus QIAcube<br>HT Kit,<br>Qiagen Qiacube HT.<br><br><i>(Referred to here as Qiagen<br/>protocol)</i> | ACL buffer (190 µl)                   | GITC 30 - <50%                                                  | 1.6 : 1                           |
|                                                                                                                             | ATL buffer (100 µl)                   | 1 - <3% SDS                                                     |                                   |
|                                                                                                                             | Proteinase K (20 µl)                  |                                                                 |                                   |
|                                                                                                                             | Carrier RNA (5 µl)                    |                                                                 |                                   |
|                                                                                                                             | MS2 (10 µl)                           |                                                                 |                                   |
| ThermoFisher,<br>MagMax Pathogen<br>RNA/DNA kit,<br>Kingfisher Flex.                                                        | Lysis binding<br>buffer (350 µl)      | GITC 55-80%<br><br><0.001%<br><br>Acrylamide<br><br>Zwittergent | 3.8 : 1                           |

Dstl ©Crown Copyright, 2021

|                                                                                                                                        |                                      |                                                     |         |
|----------------------------------------------------------------------------------------------------------------------------------------|--------------------------------------|-----------------------------------------------------|---------|
| <i>(Referred to here as MagMax Protocol 1)</i>                                                                                         | Isopropanol (300 $\mu$ l)            | 100% 2-propanol                                     |         |
|                                                                                                                                        | Carrier RNA (2 $\mu$ l)              |                                                     |         |
|                                                                                                                                        | Water (100 $\mu$ l)                  |                                                     |         |
|                                                                                                                                        | MS2 (10 $\mu$ l)                     |                                                     |         |
| ThermoFisher, MagMax viral/pathogen nucleic acid isolation kit, Kingfisher Flex.<br><br><i>(Referred to here as MagMax Protocol 2)</i> | Lysis binding buffer (265 $\mu$ l)   | GITC 55-80%<br><0.001%<br>Acrylamide<br>Zwittergent | 1.4 : 1 |
|                                                                                                                                        | Proteinase K (5 $\mu$ l)             |                                                     |         |
|                                                                                                                                        | †Water (Magnetic beads) (10 $\mu$ l) |                                                     |         |
|                                                                                                                                        | MS2 (10 $\mu$ l)                     |                                                     |         |

486 \*As identified directly from components, manufacturer information, or inferred from the  
487 associated MSDS.

488 †Water was used to replace the magnetic beads as the washing steps described below  
489 would not remove the beads and the beads interfered the read-out of the TCID<sub>50</sub> assay.

490 GITC: Guanidinium thiocyanate. SDS: Sodium dodecyl sulphate

491 **TABLE 2. Summary of results following cell culture passage and TCID<sub>50</sub> assay.** Passage results shown are after the third serial. TCID<sub>50</sub> titres  
 492 are mean titre/ml and standard deviation. \* Indicates the TCID<sub>50</sub>/ml is extrapolated from known starting concentration and calculated based  
 493 on number of flasks infected. SARS-2 = SARS-CoV-2. TCM = Tissue culture media. LLoQ = Lower limit of Quantification (< 10 TCID<sub>50</sub>/ml). SD =  
 494 Standard deviation.

| Inactivation protocol                   | Qiagen protocol                  |                                                   | MagMax protocol 1                |                                                   | MagMax protocol 2                |                                                   |
|-----------------------------------------|----------------------------------|---------------------------------------------------|----------------------------------|---------------------------------------------------|----------------------------------|---------------------------------------------------|
|                                         | Flasks infected/<br>total flasks | TCID <sub>50</sub> /ml<br>(SD)                    | Flasks infected/<br>total flasks | TCID <sub>50</sub> /ml<br>(SD)                    | Flasks infected/<br>total flasks | TCID <sub>50</sub> /ml<br>(SD)                    |
| 1. SARS-CoV-2 Starting titre            | 3/3                              | 1.7 x 10 <sup>7</sup><br>(1.2 x 10 <sup>7</sup> ) | 3/3                              | 5.9 x 10 <sup>6</sup><br>(3.6 x 10 <sup>6</sup> ) | 3/3                              | 3.0 x 10 <sup>6</sup><br>(3.8 x 10 <sup>5</sup> ) |
| 2. SARS-CoV-2 10 <sup>-4</sup> dilution | 3/3                              | 1.7 x 10 <sup>3</sup> *                           | 3/3                              | 5.9 x 10 <sup>2</sup> *                           | 3/3                              | 3.0 x 10 <sup>2</sup> *                           |
| 3. SARS-CoV-2 10 <sup>-5</sup> dilution | 3/3                              | 1.7 x 10 <sup>2</sup> *                           | 3/3                              | 59.4 *                                            | 2/3                              | 20.0 *                                            |
| 4. SARS-CoV-2 10 <sup>-6</sup> dilution | 3/3                              | 17 *                                              | 1/3                              | 2.0 *                                             | 1/3                              | 0.7 *                                             |
| 5. SARS-CoV-2 10 <sup>-7</sup> dilution | 2/3                              | 1.1 *                                             | 0/3                              | 0 *                                               | 0/3                              | 0 *                                               |



|                                        |     |                                               |     |                                               |     |                                               |
|----------------------------------------|-----|-----------------------------------------------|-----|-----------------------------------------------|-----|-----------------------------------------------|
| 6. SARS-CoV-2 + TCM                    | 9/9 | 4.4x10 <sup>5</sup><br>(3.8x10 <sup>5</sup> ) | 9/9 | 2.0x10 <sup>5</sup><br>(2.3x10 <sup>5</sup> ) | 9/9 | 7.7x10 <sup>4</sup><br>(4.8x10 <sup>4</sup> ) |
| 7. SARS-CoV-2 + lysis buffer           | 3/9 | <LLOQ                                         | 0/9 | 0                                             | 0/9 | <LLOQ                                         |
| 8. SARS-CoV-2 + heat                   | 9/9 | 8.9x10 <sup>2</sup><br>(8.5x10 <sup>2</sup> ) | 9/9 | 41.4<br>(30.0)                                | 8/9 | 17.4<br>(12.1)                                |
| 9. SARS-CoV-2 + lysis buffer +<br>heat | 0/9 | 0                                             | 0/9 | 0                                             | 0/9 | 0                                             |
| 10. TCM + Lysis buffer                 | 0/9 | 0                                             | 0/0 | 0                                             | 0/9 | 0                                             |

496 **FIGURE 1. Titre of SARS-CoV-2 by TCID<sub>50</sub> assay following inactivation protocols.** A. Qiagen protocol, B. MagMax protocol 1, B. MagMax  
 497 protocol 2. Mean + Standard Deviation collated from triplicate results from three separate occasions (n=9). Dashed line = Lower limit of  
 498 quantification (LLoQ < 10 TCID<sub>50</sub>/ml); Tissue culture media (TCM). Kruskal-Wallis ANOVA with Dunn’s multiple comparison post hoc, where \* p  
 499 <0.05, \*\*p<0.01, \*\*\*p<0.001, \*\*\*\*p<0.0001; statistical analysis excludes virus stock and lysis only data.

500

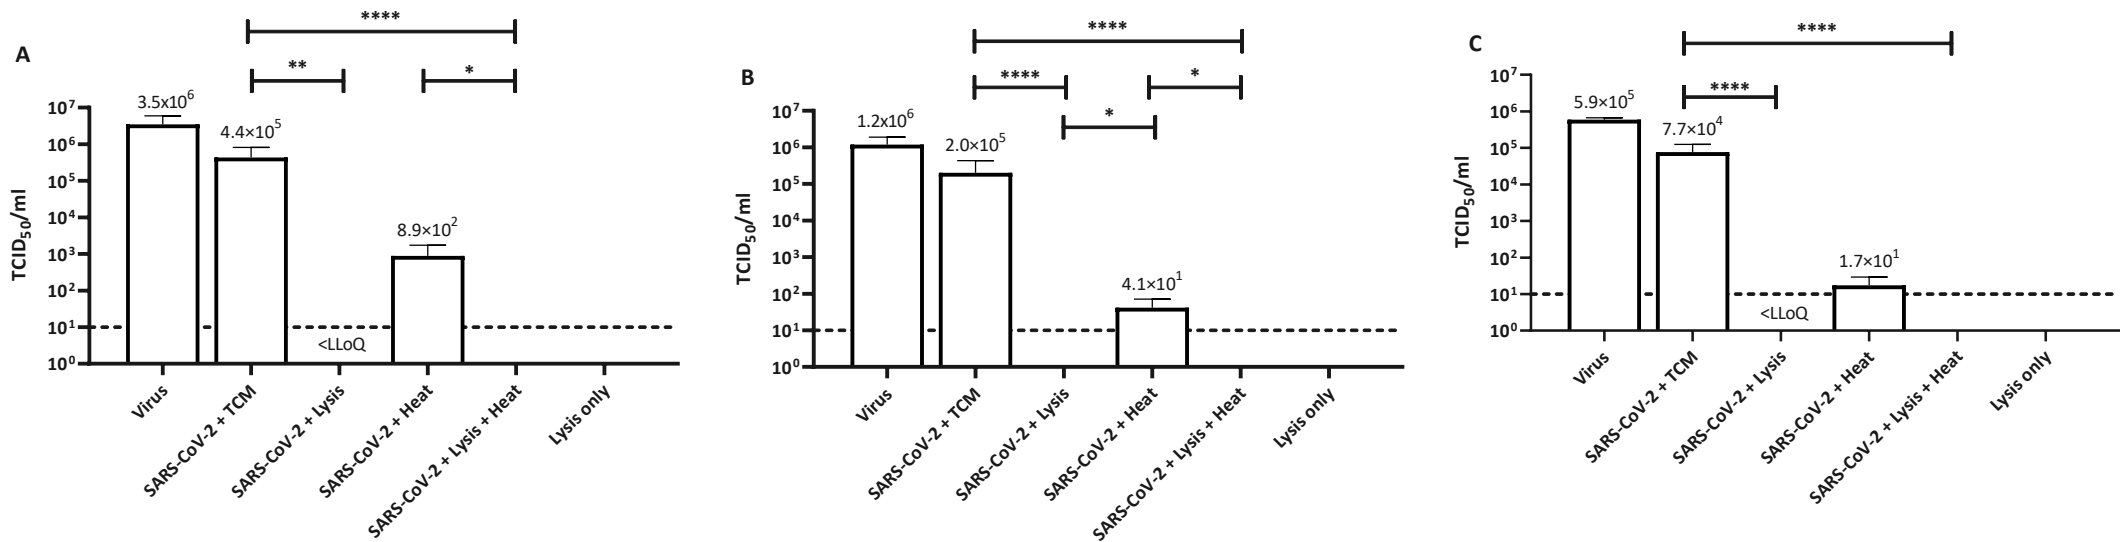

Dstl ©Crown Copyright, 2021

501
